# Supplementary material
Source: publisher figshare collection journal article supplement (https://sage.figshare.com/ndownloader/files/13438712)
Supplement: Supplementary file 1 [file 13438712]

# Gender Differences in Political Participation: Comparing Street Demonstrators in Sweden and the United Kingdom

Silke Roth, University of Southampton and Clare Saunders, University of Exeter

We analyse data collected from protest surveys as part of a cross-national project “Caught in the Act of Protest”, a European Science Foundation, European Collaborative Research Project (ECRP), reference 08-ECRP-001. The UK part was administered by the ESRC, reference ES/G011621/1.

## APPENDIX: Variables included in the analysis, survey questions and coding

| Variables                                             | Survey question                                                                                                                                                                                                                                                                                | Coding                                                                                                                   |
|-------------------------------------------------------|------------------------------------------------------------------------------------------------------------------------------------------------------------------------------------------------------------------------------------------------------------------------------------------------|--------------------------------------------------------------------------------------------------------------------------|
| <b>Dependent variable</b>                             |                                                                                                                                                                                                                                                                                                |                                                                                                                          |
| <i><b>Voted in general election</b></i>               | <i>Did you vote in the last national / general election? (May 2005 or 2010 depending on the timing of the protest)</i>                                                                                                                                                                         | 1=Yes<br>0=No                                                                                                            |
| <i><b>Contacted a politician</b></i>                  | <i>There are many things people can do to prevent or promote change. Have you, <u>in the past 12 months</u> ... ?<br/>Contacted a politician, government, or local government official?</i>                                                                                                    | 1=Yes<br>0=No                                                                                                            |
| <i><b>Member of political party</b></i>               | <i>If you have been involved in any of the following types of organizations <u>in the past 12 months</u>, please indicate whether you are a passive member or an active member? If you are a member of several organizations of the same type, tick the highest or most ‘active’ category.</i> | Originally coded:<br>0=not a member<br>1=passive<br>2= active.<br>Recoded so that:<br>1=1 (yes)<br>2=1 (yes)<br>0=0 (no) |
| <i><b>Active in political party</b></i>               | See cell immediately above                                                                                                                                                                                                                                                                     | Recoded so that:<br>1=0 (yes)<br>2=1 (yes)<br>0=0 (no)                                                                   |
| <i><b>Participation in institutional politics</b></i> | No direct survey question, computed variable.                                                                                                                                                                                                                                                  | Computed as a score of the four variables above. Range 0-4.                                                              |
| <b>Independent variables</b>                          |                                                                                                                                                                                                                                                                                                |                                                                                                                          |
| <i><b>Female</b></i>                                  | <i>Are you ...?</i>                                                                                                                                                                                                                                                                            | Original coding:                                                                                                         |

|                                  |                                                                                                                                                                                   |                                                                   |
|----------------------------------|-----------------------------------------------------------------------------------------------------------------------------------------------------------------------------------|-------------------------------------------------------------------|
|                                  |                                                                                                                                                                                   | Male = 1<br>Female =2<br>Recoded so that:<br>Male =0<br>Female =1 |
| <b><i>Labour</i></b>             | No survey question                                                                                                                                                                | 1=Labour demonstration<br>0=Anti-racism demonstration             |
| <b><i>UK</i></b>                 | No survey question                                                                                                                                                                | 1= UK demonstrator<br>0 = Swedish demonstrator                    |
| <b>Controls</b>                  |                                                                                                                                                                                   |                                                                   |
| <b><i>Political interest</i></b> | <i>How interested are you in politics?</i>                                                                                                                                        | Four point scale where:<br>1=Not at all<br>4=Very                 |
| <b><i>Trust parties</i></b>      | <i>Below is a list of institutions. Please indicate, in general, how much you would say that you trust each of the following (type of) institutions...<br/>Political parties.</i> | Five-point scale where:<br>1=Not at all<br>5=Very much            |
| <b><i>Age</i></b>                | <i>In which year were you born?</i>                                                                                                                                               | Computed by subtracting year born from year of demonstration.     |
